# Supplementary material
Source: PubMed Central journal article supplement (PMC6085745)
Supplement: NIHMS983864-supplement-Supp1.pdf [file NIHMS983864-supplement-Supp1.pdf]

## Supplementary Materials

for

### Social Analogical Reasoning in School-Aged Children with Autism Spectrum Disorder and Typically-Developing Peers

**Supplementary Table 1.** List of verbal descriptors for social content analogical reasoning stimuli

| Interaction pictured at top of screen<br>(base analog)     | Correct answer choice                                                               | Distractor answer choices                                                                                                                      |
|------------------------------------------------------------|-------------------------------------------------------------------------------------|------------------------------------------------------------------------------------------------------------------------------------------------|
| A teacher teaching students in a classroom                 | A soccer coach talking to children at soccer practice                               | Students getting on a school bus; A group of people gathered near a tall building; people sitting and playing at a swimming pool.              |
| Two people waltzing in a ballroom                          | Two people square dancing at a fair                                                 | Musicians playing classical music; Two people leaning on each other in dresses; People building a snowman                                      |
| A clown performing for children at an outdoor party        | A boy dancing in the street as people watch                                         | A group of party balloons; A group of people gathered outdoors; Two people having coffee together                                              |
| *People celebrating as newlyweds kiss at a wedding         | Graduates celebrating at a graduation ceremony                                      | A wedding cake; a group of people walking together; A swimming instructor teaching children in a pool                                          |
| A boy sharing an ice cream cone with a girl on grass       | A woman feeding a carrot to a horse                                                 | An ice cream sundae; Two people facing each other and holding hands from opposite sides of a door; A girl reading a book on grass.             |
| An older man helping a younger man tie his tie near a tree | A young woman helping another young woman attach a wedding veil to her hair indoors | A tuxedo; A man and a woman shaking hands near trees; Two men jumping into a lake                                                              |
| Swimmers competing with each other in a pool               | Runners competing with each other on a track                                        | Lifeguard watching people at a pool; Group of people jumping next to each other; People helping each other move a piano                        |
| Two bears fighting in a river                              | Two boxers punching each other in a boxing ring                                     | A man standing in a river with a very large fish; Rock formations arching over a body of water; people watching a movie in a theater           |
| A young woman helping a boy prepare food in a kitchen      | An older woman helping a little girl weave at a loom                                | A sheet of chocolate chip cookies; A man and a woman having a difficult conversation at a table; A group of people competing in a bicycle race |

A woman reading a story to a group of children sitting in a library

A man making a business presentation to a group of business people

Shelves of children's books in a library; A group of young people sitting on a college campus; A young couple holding hands outdoors

A group of people working together to wash a car in a parking lot

A group of people working together to put a puzzle together indoors

A group of people sitting together in a car; Two people looking at art in a gallery; Two women laughing together

Two boys sitting on a sidewalk competing with each other in a game of chess

Two men in motion while competing with each other in an Olympic ping-pong match

A group of dice and board game pieces; A woman and a man facing each other across a small table; two girls on a floor facing the same direction

A young polar bear climbing on a large polar bear's side in the snow

A girl climbing on a woman's back.

A man skiing on a snowy slope; A heavy white work desk; A group of business people working together at a table

A group of zebra's drinking together at a muddy watering hole

A group of children eating together at a table in a cafeteria

A lion looking around from atop a rock; A group of black and white striped structures in a courtyard; Two children hugging

A mother duck leading a group of ducklings across a dirt road

A teacher leading a group of children along a sidewalk in a residential neighborhood

A group of bird eggs in a nest; A dirt road running through a farm; A group of people with soccer balls on a field

Two hippopotami fighting in a river

A man and a woman having an aggressive argument

Two giraffes walking together in a forest; two dark-clad adults facing each other and shaking hands; a group of men in soccer uniforms

A kitten licking another kitten

A young child snuggling up to an infant

A fuzzy rodent mouthing a shiny fruit; A woman in a yoga pose bisecting an outdoor scene; a group of young children at a school performance

A woman placing a spoonful of baby food into an infant's mouth indoors

A robin holding a worm above a group of baby birds with their mouths open in a nest situated in a tree

A jar of baby food with a spoonful of the baby food resting on it; An older child standing with a younger child; A group of students sitting at desks in a classroom

Two people seated at a formal restaurant ordering food from a waiter

A man ordering food from another man at a food truck

Two chefs preparing food in a kitchen; A group of young people sitting together playing a video game; A group of young people celebrating at the top of a mountain.
