# Supplementary material
Source: PubMed Central journal article supplement (PMC6085745)
Supplement: NIHMS983864-supplement-Supp2.pdf [file NIHMS983864-supplement-Supp2.pdf]

**Supplementary Materials**

**for**

**Social Analogical Reasoning in School-Aged Children with Autism Spectrum Disorder  
and Typically Developing Peers**

# Instructions for social content analogical reasoning task

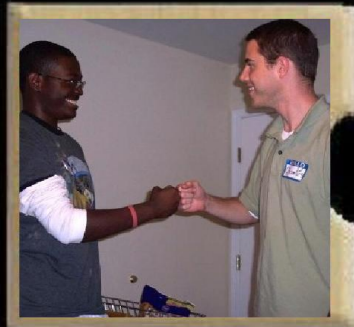

?

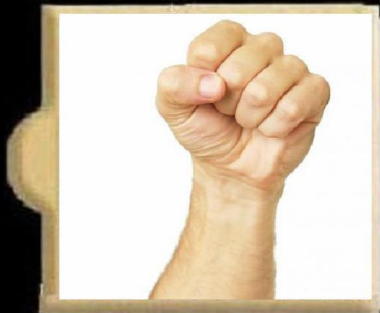

1

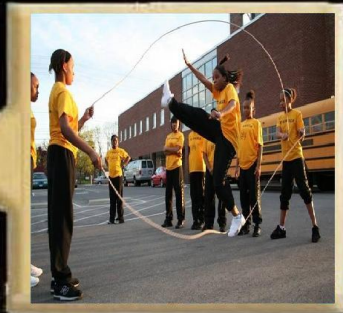

2

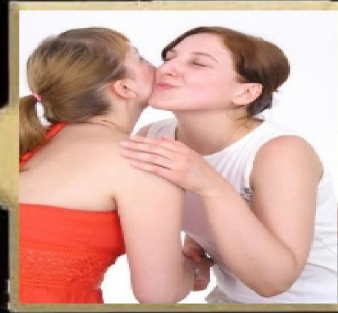

3

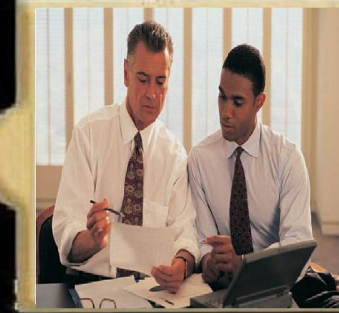

4

For this round of the game, there is only one picture on the top. This picture shows people (or sometimes animals) interacting with each other. Your job in this game is to figure out which of the bottom pictures goes with the top picture.

{press any button to continue}

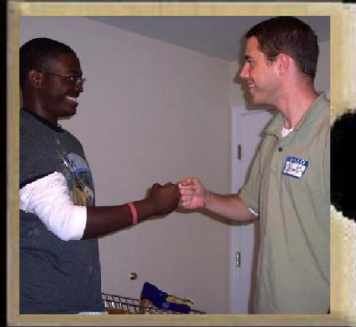

?

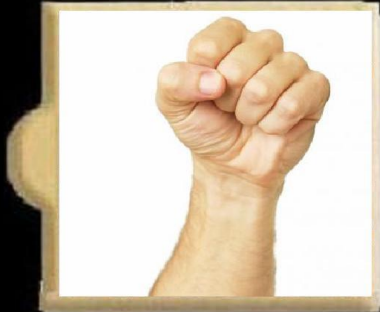

1

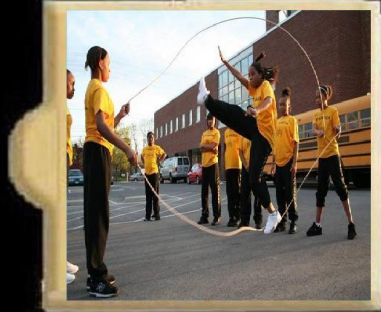

2

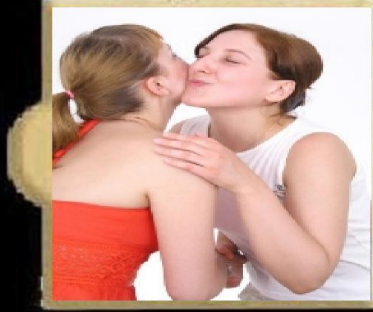

3

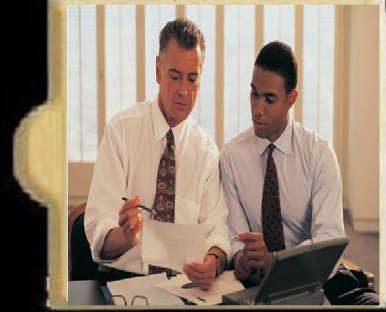

4

There may be more than one picture that you think can go with the two men, but you want to pick the picture that shows the **same type of interaction** as the top picture. Does that make sense? Which picture will you choose?

{press any button to continue}

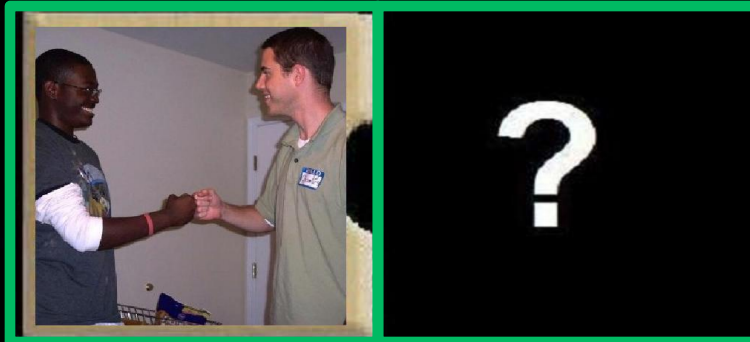

?

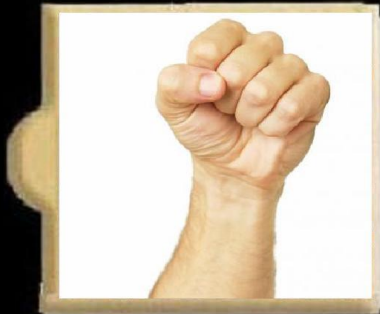

1

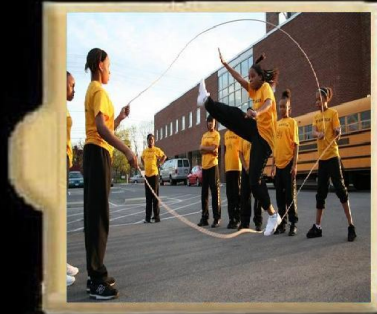

2

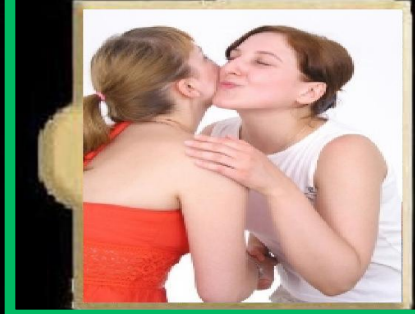

3

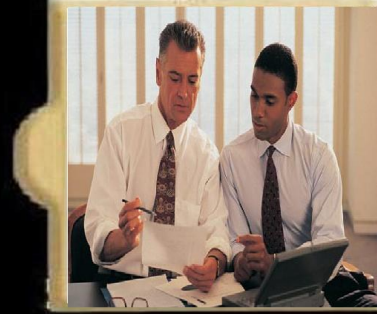

4

Right! The **women hugging** each other is the **same type of interaction** as the **men greeting** each other.

{press any button to continue}

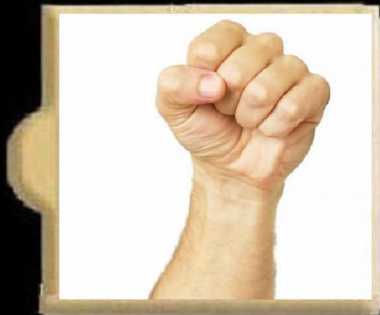

1

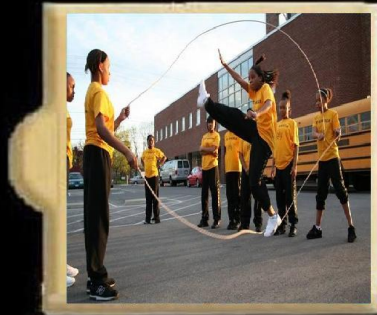

2

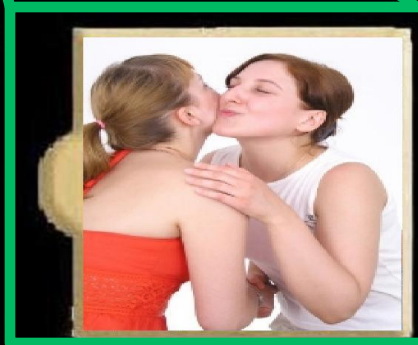

3

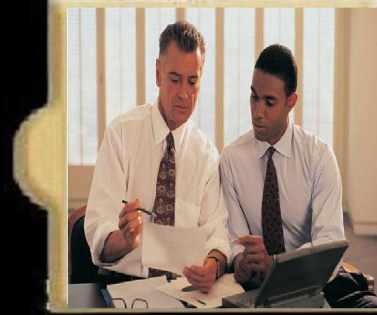

4

Actually, the **women hugging** goes with the **men greeting** each other because it is **the same type** of interaction. Remember, there may be other pictures you think go with the top one, but you want to pick the one with the same type of interaction. Does that make sense?

{press any button to continue}

Good Job!

Now you're ready to start the game. You will still respond using the buttons just like you have been doing. Try to do your best. It's ok if you make a mistake, the computer will just go on to the next one.

Remember...

**You want to pick the image from the bottom row that shows the same type of interaction as the image on top.**

Good luck!

{press any button to continue}
